# Supplementary material
Source: PubMed Central journal article supplement (PMC5442443)
Supplement: NIHMS857201-supplement-SI.pdf [file NIHMS857201-supplement-SI.pdf]

Supporting material for:

**Experimental and Computational Analysis of Protein Stabilization by Gly-to-D-Ala substitution: A Convolution of Native State and Unfolded State Effects**

Junjie Zou, Benben Song, Carlos Simmerling, Daniel Raleigh

## Methods

### Protein Solid Phase Synthesis

The proteins and their Gly-to-D-Ala variants were chemically synthesized using Fmoc chemistry<sup>1</sup>. Sequences of these proteins are provided below. EH, GA and PSBD have a free N-terminus and amidated C-terminus, while HP35 has a free N-terminus and free C-terminus. Peptide identity was confirmed using MALDI or ESI and purity was greater than 95%. EH, observed mass 7453.97, expected mass 7453.52; EH D-Ala, observed mass 7467.75, expected mass 7467.55; GA D-Ala, observed mass 5143.96, expected mass 5143.91; HP35, observed mass 4065.16, expected mass 4064.13; HP35 D-Ala, observed mass 4079.32, expected mass 4078.15. PSBD, observed 4400.72, expected 4402.10.

### Sequences of the Proteins Synthesized for This Study

dA refers to D-Ala and L<sub>N</sub> refers to nor-leucine.

**EH:** MDEKRPRTAFSSEQLARLKREFNENRYLTERRRQQLSSELGLNEAQIKIWFQNKRAKIKKS

**EH-G39D-Ala:** MDEKRPRTAFSSEQLARLKREFNENRYLTERRRQQLSSELdALNEAQIKIWFQNKRAKIKKS

**GA:** LKNAIEDAIAELKKAGITSDFYFNAINKAKTVEEVNALVNEILKAHA

**GA-G16D-Ala:** LKNAKEDAIAELKKAdAITSDYFNAINKAKTVEEVNALVNEILKAHA

**HP35:** LSDEDFKAVFGMTRSAFANLPLWL<sub>N</sub>QQHLKKEKGLF

**HP35-G11D-Ala:** LSDEDFKAVFdAMTRSAFANLPLWL<sub>N</sub>QQHLKKEKGLF

**PSBD:** AMPSVRKYAREKGVDIRLVQGTGKNGRVLKEDIDAFLAGGA

**PSBD-G15D-Ala:** AMPSVRKYAREKdAVDIRLVQGTGKNGRVLKEDIDAFLAGGA

## Backbone phi/psi Angles and Calculation of the Solvent Accessibility of the Gly Backbone

The  $\phi/\psi$  angles of C-capping glycines were calculated by using VMD <sup>2</sup>. The same PDB structures used for molecular dynamics simulations were used and missing hydrogen atoms were added using tLeap in Amber <sup>3</sup>. The solvent accessible surface area (SASA) of C-capping glycines was calculated by using VMD with a water probe radii of 1.4 Å. The extended tetrapeptides were constructed using tLeap with the same local sequence as the respective full length proteins. The C-termini of the tetrapeptides were amidated and the N-termini were acetylated. Residues in the extended peptides all have  $\phi$  and  $\psi$  angles equal to 180°. Fractional SASA is defined as the ratio between the SASA found for the PDB structure and the SASA found for the extended tetrapeptide.

**Table S1. Backbone phi/psi and solvent accessibility of Gly**

| Protein   | $\phi$ (°) | $\psi$ (°) | SASA (Å <sup>2</sup> ) | SASA in extended tetrapeptide (Å <sup>2</sup> ) | Fractional SASA (%) |
|-----------|------------|------------|------------------------|-------------------------------------------------|---------------------|
| EH        | 51.8       | 35.8       | 64.0                   | 88.5                                            | 72.4                |
| GA        | 107.8      | -21.7      | 55.5                   | 120.8                                           | 45.9                |
| HP35      | 75.7       | 19.8       | 66.9                   | 73.1                                            | 91.5                |
| NTL9      | 70.4       | 26.9       | 36.7                   | 98.9                                            | 37.1                |
| PSBD      | 84.0       | 48.1       | 63.5                   | 94.0                                            | 67.6                |
| Trp-cage  | 119.9      | 10.0       | 31.6                   | 113.0                                           | 28.0                |
| UBA       | 127.0      | 1.3        | 64.2                   | 95.9                                            | 67.0                |
| Ubiquitin | 81.2       | 5.2        | 53.7                   | 100.5                                           | 53.4                |

## Thermal and Urea/Guanidine Denaturation

The unfolding free energy of each protein was measured by CD-monitored urea/guanidine hydrochloride denaturation at 222nm under the conditions listed in **Table S2**. Thermal denaturation experiments were also conducted at 222nm using the same buffer and pH employed for the urea/guanidine hydrochloride denaturation experiments. The concentration of urea/guanidine was determined by measuring the refractive index on a refractometer. Urea/guanidine denaturation experiments were carried out with a titrator unit interfaced to the CD spectrometer. Unfolding curves for EH, GA, PSBD were recorded using Aviv model 62A DS and 202SF circular dichroism spectrophotometers. Unfolding curves for HP35 were recorded using an Applied Photophysics Chirascan instrument.  $\Delta G^\circ$  of unfolding was determined by fitting the urea/guanidine denaturation curves to the following equation:

$$\theta[\text{denaturant}] = \frac{(a_n + b_n[\text{denaturant}]) + (a_d + b_d[\text{denaturant}])e^{-\left(\frac{\Delta G^\circ([\text{denaturant}] )}{RT}\right)}}{1 + e^{-\left(\frac{\Delta G^\circ([\text{denaturant}] )}{RT}\right)}} \quad (1)$$

$$\Delta G^\circ([\text{denaturant}]) = \Delta G^\circ(H_2O) - m[\text{denaturant}] \quad (2)$$

where  $\theta$  is the measured ellipticity,  $a_n, b_n, a_d, b_d$  are the parameters that define the signals of the native state and denatured state.  $\Delta G^\circ([\text{denaturant}])$  is the free energy change upon unfolding as a function of denaturant and  $\Delta G^\circ(H_2O)$  is the free energy change in the absence of denaturant. Thermal unfolding data was fit using standard methods and the Gibbs-Helmholtz equation to obtain the melting temperature  $T_m$  and  $\Delta H^0$  at  $T_m$ .

$$\theta[T] = \frac{(a_n + b_n T) + (a_d + b_d T)e^{-\left(\frac{\Delta G^\circ(T)}{RT}\right)}}{1 + e^{-\left(\frac{\Delta G^\circ(T)}{RT}\right)}} \quad (3)$$

$$\Delta G^{\circ}(T) = \Delta H^{\circ}(T_m) \left(1 - \frac{T}{T_m}\right) - \Delta C_p^{\circ} [T_m - T + T \ln\left(\frac{T}{T_m}\right)]$$

(4)

Where  $T_m$  is the melting temperature.  $\Delta H^{\circ}(T_m)$  is the change of enthalpy upon unfolding at the melting temperature.  $\Delta C_p^{\circ}$  is the change of heat capacity upon unfolding.

### Thermal and Urea/Guanidine Denaturation Conditions

**Table S2. Conditions for thermal and urea/guanidine denaturation experiments**

| Protein | Urea/guanidine<br>hydrochloride | Buffer                                                                 | pH  | Temperature<br>(°C) |
|---------|---------------------------------|------------------------------------------------------------------------|-----|---------------------|
| EH      | Urea                            | 50mM sodium acetate                                                    | 5.7 | 5                   |
| GA      | Guanidine<br>hydrochloride      | 50mM phosphate                                                         | 7.0 | 25                  |
| HP35    | Urea                            | 100mM sodium chloride<br>and 20mM sodium acetate                       | 4.8 | 25                  |
| PSBD    | Guanidine<br>hydrochloride      | 2mM sodium phosphate,<br>2mM sodium borate and<br>50mM sodium chloride | 8.0 | 25                  |

## Molecular Dynamics Simulations Using an Explicit-water Model

The starting structures used for the simulations of EH, GA, HP35, NTL9, PSBD, Trp-cage, UBA and ubiquitin were obtained from the pdb files 1ENH <sup>4</sup>, 1PRB <sup>5</sup>, 1WY4 <sup>6</sup>, 2HBB <sup>7</sup>, 2PDD <sup>8</sup>, 1L2Y <sup>9</sup>, 1DV0 <sup>10</sup> and 1UBQ <sup>11</sup> respectively. Residues not included in the sequences listed above were deleted from the pdb file and the actual missing residues were added by Swiss PDB <sup>12</sup> and equilibrated by MD simulations with restraints on all other residues. C-Terminal amidation and N-terminal acetylation was added if the studied proteins had these modifications. X-ray structures are available for EH, HP35, NTL9 and ubiquitin, while only NMR structures are available for GA, PSBD, Trp-cage and UBA. For proteins with multiple models from NMR studies, the RMSD of each model was calculated using the average conformation as the reference. The model with the lowest RMSD was chosen as the starting structure for MD simulations. Starting structures for D-Ala mutants were created using tLeap in Amber <sup>3</sup>. Four independent MD simulations were run for each protein and for the D-Ala variant with different initial velocities, which results in eight simulations in total. The length of the simulations were 200 ns with the stepsize set to 2 fs. All simulations were performed using the Amber software package with the Amber ff14SB force field <sup>13</sup> and TIP3P water <sup>14</sup>. Parameters for nor-leucine were obtained from Forcefield\_NCAA <sup>15</sup>. No ions were included in the system. All simulations were conducted under constant pressure conditions at 298K using Berendsen barostat to control pressure <sup>16</sup>. Temperature was controlled using a weak-coupling algorithm with the coupling constant set to 1 ps <sup>16</sup>. Truncated octahedron boxes with periodic boundary condition were used. Particle mesh Ewald methods were used to calculate electrostatic energies <sup>17</sup>. Hydrogen atoms were constrained using the SHAKE algorithm <sup>18</sup>. The cutoff of non-bonded interactions was set to 8 Å. The N-terminus was acetylated and C-terminus was amidated for proteins which had free termini and in which the termini were calculated to be neutral since deprotonated N-terminus and

protonated C-terminus are not currently available in the Amber force field <sup>13</sup>. Regular terminal residues defined in the Amber force field <sup>13</sup> were used for cases where the N and C termini were charged.

Local effects in the unfolded state were modeled as blocked tetrapeptides with sequence ACE-Xaa<sub>1</sub>-Gly/dAla-Xaa<sub>2</sub>-NH<sub>2</sub>. Xaa<sub>1</sub> and Xaa<sub>2</sub> are the two residues adjacent to the C-capping Gly/dAla in the full length protein sequences. This approach provides a model of purely local interactions and is not meant to mimic the actual unfolded chain. In order to enhance sampling, the tetrapeptides were simulated at 500K for 0.4ns, followed by cooling from 500K to 298K in 0.4ns and 0.4ns at 298K. This annealing cycle was repeated 120 times. Only data from 298K was collected for all cycles. These procedures were repeated thrice with different initial velocities which resulted in 3 sets of 4 independent folded state simulations and 3 sets of 120 annealing cycles of unfolded state simulations. A total of 96,000 frames from the folded state simulations and 144,000 frames from the unfolded state simulations at 298K were saved for analysis.

### **Starting Structures of PSBD, Trp-cage and UBA used for MD Simulations**

PSBD, Trp-cage and UBA have multiple models obtained through NMR experiments. For each model, the backbone RMSD was calculated using VMD <sup>2</sup>. The reference coordinates are the averaged coordinates of all the models. The models used as starting structures are as follows:

| Protein  | PDB code | Model number |
|----------|----------|--------------|
| PSBD     | 2PDD     | Model 32     |
| Trp-cage | 1L2Y     | Model 32     |
| UBA      | 1DV0     | Model 15     |

### **Assignment of Protonation States of Titratable Residues during MD Simulations**

Protonation states of titratable residues were set to reflect the pH at which thermodynamic properties of proteins were measured. The H++ server was used to determine the protonation state <sup>19</sup>. Experimental  $\Delta\Delta G^\circ$  have been reported for the ubiquitin variants over the pH range of 2.5 to 3.5 <sup>20</sup>. The value of  $\Delta\Delta G^\circ$  at pH 2.5 was compared to the calculated value since the TI approach only allows fixed protonation states. By fixing all the acidic residues and the C-terminus to be protonated, the system resembles that expected at pH=2.5.

Protonation states for titratable residues and terminus are listed in the table below. Asp, Glu, and C-termini which are not listed were fixed in the deprotonated state. Lys, Arg and N-termini which are not listed were fixed in the protonated state.

| Protein   | pH  | Asp and Glu                    | His                   | C-terminus and N-terminus |
|-----------|-----|--------------------------------|-----------------------|---------------------------|
| EH        | 5.7 |                                |                       |                           |
| GA        | 7.0 |                                | 52, doubly protonated |                           |
| HP35      | 4.8 |                                | 68, doubly protonated |                           |
| NTL9      | 5.5 |                                |                       |                           |
| PSBD      | 8.0 |                                |                       | Deprotonated N-terminus   |
| Trp-cage  | 7.0 |                                |                       |                           |
| UBA       | 6.5 |                                |                       |                           |
| Ubiquitin | 2.5 | All Asp and Glu are protonated | 68, doubly protonated | Protonated C-terminus     |

## Free Energy Calculations



Free energy calculations were performed using non-softcore thermodynamic integration implemented in Amber<sup>3,21</sup>. Gly was turned into D-Ala in three stages. In the first stage, partial charges on the CA/HA2/HA3 of Gly were turned off. In the second stage, three dummy atoms were added to the disappearing glycine and van der Waals interaction of these dummy atoms were turned on so a D-Ala with no partial charges on the CA/HA/CB/HA1/HA2/HA3 atoms appeared. In the third stage, partial charges on the CA/HA/CB/HA1/HA2/HA3 atoms of D-Ala were turned on. The first and third stages have  $\lambda$  evenly distributed from 0.0 to 1.0 with an interval of 0.1 including 0.0 and 1.0. In order to avoid singularity at  $\lambda = 0.0$  and  $\lambda = 1.0$  and have more sampling at where  $dV/d\lambda$  has a steep change, the second stage has  $\lambda$  equal to 0.00922, 0.04794, 0.115, 0.20634, 0.316, 0.43738, 0.56262, 0.68392, 0.79366, 0.88495, 0.95206, 0.99078. For the folded state, one set of the TI calculations began with the C-capping glycine in place and used the crystal structures. Dummy atoms were added to the experimental structures to give the starting structures for the second stage of the calculations. Starting structures for the third stage were obtained by changing the Gly in the experimental structures to D-Ala. The alternate set of TI calculations was derived from the last frames of a 50 ns standard MD simulations of the D-Ala mutants. The structures resulting from these simulations were converted back to the Gly containing variants to provide starting structures for the first stage of the calculations.

For the folded state, MD simulations used the same set up as the standard MD simulations described above except that the length of the simulation was set to 12ns for each window. The blocked peptides, which model local interactions in the unfolded state, were converted from Gly to D-Ala in three stages using the same  $\lambda$  values that were used for the folded states. The same sampling enhancement strategy described above was used for all stages and  $\lambda$  windows. Only data from 298K was collected. Numerical integration was performed using trapezoidal

integration. Three  $\Delta\Delta G^\circ$  values were obtained by dividing simulations of each  $\lambda$  window for the folded states and unfolded states into three blocks. Error bars for the calculated  $\Delta\Delta G^\circ$  were the standard deviation of the three  $\Delta\Delta G^\circ$  values.

### Energy Decomposition and Analysis of First Shell Water Molecules

The van der Waals potential energy between Gly or D-Ala and the rest of protein was calculated by post processing MD simulation trajectories. 1-4 van der Waals interactions were considered as van der Waals interactions with a scaling factor of 0.5.  $\Delta\Delta E_{\text{vdw}}$  is defined as:

$$\Delta\Delta E(VDW) = [E_{D-ala}^u(VDW) - E_{Gly}^u(VDW)] - [E_{D-ala}^f(VDW) - E_{Gly}^f(VDW)] \quad (5)$$

where “u” and “f” indicate unfolded and folded states respectively. For example,  $E_{D-ala}^u(VDW)$  is the van der Waals interaction between D-Ala residue and the rest of the protein in the unfolded state.

The first shell water molecules were counted by using Cpptraj<sup>22</sup> in Amber, with a cutoff of 3.4 Å. For the folded states, the first shell water molecules around the amide nitrogen, amide proton, carbonyl carbon and carbonyl oxygen of residues i-4 to i+1 (i=Gly/D-Ala) were counted because these atoms are structurally close to the C-capping residues. For the unfolded states, the water molecules around amide nitrogen, amide proton, carbonyl carbon and carbonyl oxygen of residues i-1 to i+1 (i=Gly/D-Ala) were counted.

$$\text{Number of water molecules (unfolded - folded)} = (n_{D-ala}^u - n_{Gly}^u) - (n_{D-ala}^f - n_{Gly}^f) \quad (6)$$

Where n is the number of first shell water molecules. The error bars of  $\Delta\Delta E_{\text{vdw}}$  and number of water molecules (unfolded-folded) are the standard deviation of the 3 sets of simulations.

The desolvation effect on the backbone was also quantified by using Poisson Boltzmann (PB) equation solved by DelPhi<sup>23</sup>. The Amber ff14SB partial charges<sup>13</sup> and Yamagishi, J's radii set<sup>24</sup> were used.

$$\Delta\Delta G(bb\_solvation) =$$

$$[G_{D-ala}^u(bb\_solvation) - G_{Gly}^u(bb\_solvation)] - [G_{D-ala}^f(bb\_solvation) - G_{Gly}^f(bb\_solvation)]$$

(7)

Since PB equation is non-linear, the solvation energy of each term on the right side of equation 7 was calculated in two steps. In the first step, we calculated the solvation energy of the whole protein with partial charges on the amide nitrogen, amide proton, carbonyl carbon and carbonyl oxygen of residues i-4 to i+1 (i-1 to i+1 for the unfolded state; i=Gly/D-Ala). In the second step, the partial charges on the amide nitrogen, amide proton, carbonyl carbon and carbonyl oxygen of residues i-4 to i+1 (i-1 to i+1 for the unfolded state; i=Gly/D-Ala) were set to 0 and the solvation energy of the whole protein was calculated again. The difference in the solvation energy obtained from these two step was considered as the solvation energy of the backbone around the Gly/D-Ala.

### Calculation of $\Delta\Delta E_{vdw-gb}$ Using an Implicit-solvent Model

The length of the simulations were 5 ns with stepsize set to 1fs. Amber ff14SBonlysc<sup>25</sup> was used and igb was set to 8 which corresponds to GBneck2 implicit solvent model<sup>26</sup>. Mbondi3 radii set was used<sup>26</sup>. Simulations were conducted under 200K due to low thermostability of proteins in the implicit-solvent model used here<sup>25</sup>. Langevin dynamics was employed with the collision

frequency set to 1 ps<sup>-1</sup>. No cutoff of non-bond interactions was used. The salt concentration was set to 0.0 M.

For the experimentally tested proteins (EH, GA, HP35, NTL9, PSBD, Trp-cage, UBA and ubiquitin), the starting structures were prepared in the same way as for the simulations in explicit solvent except no solvent was added. For the 120 proteins and their D-Ala variants listed in **Table S3**, any selenomethionines were converted to methionines and all acidic residues were deprotonated and all basic residues except histidines were protonated. The protonation states of histidines depends on whether the hydrogen on  $\delta$  or  $\epsilon$  nitrogen is resolved by X-ray. If neither of the hydrogens is resolved, the  $\epsilon$  nitrogen was protonated. Disulphide bonds were added as indicated by the authors of the structures. All non-protein molecules and ions were deleted. Local effects in the unfolded states of proteins were modeled as blocked tetrapeptides. The tetrapeptides were simulated at 400K for 0.4ns, followed by cooling from 400K to 200K in 0.4ns and 0.4ns at 200K. This annealing cycle was repeated 160 times. The van der Waals potential energy between Gly or D-Ala and the rest of protein was calculated by post processing MD simulation trajectories. 1-4 van der Waals interactions were considered as van der Waals interactions instead of bonded interactions.  $\Delta\Delta E_{\text{vdw\_gb}}$  is defined as:

$$\Delta\Delta E(\text{VDW\_gb}) = [E_{D\text{-ala}}^u(\text{VDW\_gb}) - E_{Gly}^u(\text{VDW\_gb})] - [E_{D\text{-ala}}^f(\text{VDW\_gb}) - E_{Gly}^f(\text{VDW\_gb})] \quad (8)$$

where “u” and “f” indicate unfolded and folded states respectively. For example,  $E_{D\text{-ala}}^u(\text{VDW\_gb})$  is the van der Waals interaction between the D-Ala residue and the rest of the protein in the unfolded state calculated using the implicit-solvent model.

For the 8 experimentally tested proteins, each  $E_{D-ala}^f(VDW\_gb)$  value and each  $E_{Gly}^f(VDW\_gb)$  value is the average over 100,000 frames from 10 independent simulations with different random number seeds for Langevin dynamics. For the 120 target proteins and their variants,  $E_{D-ala}^f(VDW\_gb)$  values and  $E_{Gly}^f(VDW\_gb)$  values were averaged over 30,000 frames from 3 independent simulations. For all of the proteins,  $E_{D-ala}^u(VDW\_gb)$  values and  $E_{Gly}^u(VDW\_gb)$  values were averaged over 40,000 frames collected from the simulations at 200K.

### **Protein Chains Dataset and $\Delta\Delta E_{\text{vdw\_gb}}$**

All protein chains listed here are non-redundant protein chains with BLAST <sup>27</sup> pvalue less than  $10e-7$ . According to the authors of the structures, all of the protein chains are monomeric. All proteins have at least one  $\alpha$ -helical C-capping Gly. The criteria for defining a helix was at least 5 sequential residues with  $-140^\circ \leq \varphi \leq -30^\circ$  and  $-90^\circ \leq \psi \leq 45^\circ$ . A C-capping Gly is the first non-helical residue at the C-terminus of a helix with  $20^\circ \leq \varphi \leq 125^\circ$  and  $-45^\circ \leq \psi \leq 90^\circ$  <sup>28</sup>.  $\Delta\Delta E_{\text{vdw\_gb}}$  values were only calculated for proteins with high sequence diversity. In order to do so, a table of sequence redundancy in protein data bank was obtained from Molecular Modelling Database <sup>29</sup>. A representative of each non-redundant sequence was chosen according to the ranking provided by this table.

**Table S3. Calculated values of  $\Delta\Delta E_{\text{vdw\_gb}}$  for 160 C-capping sites from 120 non-redundant proteins taken from the pdb bank. Positive  $\Delta\Delta E_{\text{vdw\_gb}}$  values indicate a stabilizing effect.**

| pdb code | chain ID | Short description of protein                                  | Organism                               | Site No. | Calculated $\Delta\Delta E_{\text{vdw\_gb}}$ (kcal/mol) |
|----------|----------|---------------------------------------------------------------|----------------------------------------|----------|---------------------------------------------------------|
| 1ABA     | A        | T4 glutaredoxin                                               | Enterobacteria phage T4 sensu lato     | 56       | 0.61                                                    |
| 1C44     | A        | Sterol carrier protein 2                                      | Oryctolagus cuniculus                  | 32       | 0.15                                                    |
|          |          |                                                               |                                        | 86       | 1.20                                                    |
|          |          |                                                               |                                        | 97       | 0.95                                                    |
| 1KAF     | A        | The DNA Binding Domain Of Phage T4 Transcription Factor MotA  | Enterobacteria phage T4 sensu lato     | 125      | 0.59                                                    |
|          |          |                                                               |                                        | 179      | 0.36                                                    |
| 1KP6     | A        | Killer toxin kp6 alpha-subunit                                | Ustilago maydis                        | 9        | -0.35                                                   |
| 1L8R     | A        | Dachshund protein                                             | Homo sapiens                           | 255      | 0.76                                                    |
| 1L9L     | A        | Granulysin from cytolytic T lymphocytes                       | Homo sapiens                           | 63       | 0.64                                                    |
| 1LWB     | A        | Phospholipase A2 protein                                      | Streptomyces violaceoruber             | 75       | 0.35                                                    |
| 1MC2     | A        | Phospholipase A2 protein                                      | Deinagkistrodon acutus                 | 14       | 0.34                                                    |
| 1MK0     | A        | The catalytic domain of intron endonuclease I-TevI            | Enterobacteria phage T4 sensu lato     | 38       | 0.27                                                    |
| 1MOL     | A        | Monellin                                                      | Dioscoreophyllum cumminsii             | 27       | 0.87                                                    |
| 1NWZ     | A        | Light receptor photoactive yellow protein                     | Halorhodospira halophila               | 51       | 0.31                                                    |
|          |          |                                                               |                                        | 86       | 0.54                                                    |
| 1OOH     | A        | An odorant binding protein LUSH                               | Drosophila melanogaster                | 34       | 1.40                                                    |
|          |          |                                                               |                                        | 56       | 1.08                                                    |
| 1ORG     | A        | A pheromone-binding protein                                   | Rhyarobia maderae                      | 53       | 1.03                                                    |
| 1OSD     | A        | A mercury-binding protein                                     | Cupriavidus metallidurans              | 65       | 0.24                                                    |
| 1PBJ     | A        | A hypothetical protein                                        | Methanothermobacter thermautotrophicus | 59       | 0.40                                                    |
| 1Q6V     | A        | Phospholipase A2 protein                                      | Daboia russelii                        | 14       | 0.24                                                    |
| 1R6J     | A        | The PDZ2 domain of syntenin                                   | Homo sapiens                           | 231      | 0.88                                                    |
| 1SBX     | A        | The dachshund-homology domain of Nuclear protooncoprotein SKI | Homo sapiens                           | 165      | 0.66                                                    |
| 1T1J     | B        | A hypothetical protein                                        | Pseudomonas aeruginosa                 | 43       | 0.52                                                    |
|          |          |                                                               |                                        | 111      | 0.51                                                    |
| 1T8K     | A        | An apo acyl carrier protein                                   | Escherichia coli                       | 16       | 0.53                                                    |
|          |          |                                                               |                                        | 33       | 0.37                                                    |
| 1TP6     | A        | A hypothetical protein                                        | Pseudomonas aeruginosa                 | 22       | 1.21                                                    |
| 1TQG     | A        | CheA phosphotransferase domain                                | Thermotoga maritima                    | 55       | 0.20                                                    |

|      |   |                                                              |                                                       |     |       |
|------|---|--------------------------------------------------------------|-------------------------------------------------------|-----|-------|
| 1U8T | B | CheY protein                                                 | Escherichia coli                                      | 29  | 0.37  |
|      |   |                                                              |                                                       | 102 | 1.00  |
| 1VCD | A | Nudix protein Ndx1                                           | Thermus thermophilus                                  | 52  | 0.33  |
| 1VYI | A | The C-terminal domain of a polymerase cofactor               | Rabies virus                                          | 254 | 0.70  |
| 1WHZ | A | A hypothetical protein                                       | Thermus thermophilus                                  | 18  | 0.60  |
| 1WOL | A | An HEPN homologue                                            | Sulfolobus tokodaii                                   | 25  | 0.37  |
|      |   |                                                              |                                                       | 50  | 0.67  |
| 1WY4 | A | A villin headpiece                                           | Gallus gallus                                         | 51  | -0.31 |
| 1XLQ | A | Putidaredoxin                                                | Pseudomonas putida                                    | 31  | 0.44  |
| 1XMK | A | The Z $\beta$ domain from the RNA editing enzyme ADAR1       | Homo sapiens                                          | 341 | 0.78  |
| 1YN3 | A | An extracellular adherence protein                           | Staphylococcus aureus                                 | 203 | 0.12  |
| 1Z96 | A | Mud1 UBA domain                                              | Schizosaccharomyces pombe                             | 307 | 0.07  |
| 1ZMA | A | A bacterocin transport accessory protein                     | Streptococcus pneumoniae                              | 81  | 0.38  |
| 2ACY | A | An acyl-phosphatase                                          | Bos taurus                                            | 34  | 0.72  |
| 2B1L | B | A thiol:disulfide oxidoreductase                             | Escherichia coli                                      | 97  | 0.37  |
| 2B8I | A | A putative bacterial secretion factor                        | Vibrio vulnificus                                     | 56  | 0.99  |
| 2BO1 | A | Ribosomal protein L30E                                       | Thermococcus celer                                    | 30  | 0.87  |
|      |   |                                                              |                                                       | 57  | 0.65  |
|      |   |                                                              |                                                       | 75  | 0.47  |
| 2BWF | A | The UBL domain of Dsk2                                       | Saccharomyces cerevisiae                              | 36  | -0.05 |
| 2CWY | A | A hypothetical protein                                       | Thermus thermophilus                                  | 15  | 0.59  |
|      |   |                                                              |                                                       | 55  | 0.48  |
| 2CX7 | B | Sterol carrier protein 2                                     | Thermus thermophilus                                  | 89  | 0.94  |
|      |   |                                                              |                                                       | 100 | 0.65  |
| 2D48 | A | Interleukin 4                                                | Homo sapiens                                          | 95  | 0.43  |
| 2D58 | A | An ionized calcium-binding adaptor                           | Homo sapiens                                          | 78  | 0.55  |
| 2FB6 | A | A hypothetical protein                                       | Bacteroides thetaiotaomicron                          | 34  | 0.42  |
|      |   |                                                              |                                                       | 68  | 0.59  |
|      |   |                                                              |                                                       | 82  | 0.38  |
|      |   |                                                              |                                                       | 91  | 0.43  |
| 2FC3 | A | Ribosomal protein L7Ae                                       | Aeropyrum pernix                                      | 46  | 0.66  |
|      |   |                                                              |                                                       | 91  | 0.79  |
| 2FE5 | A | The second PDZ domain of DLG3                                | Homo sapiens                                          | 270 | 0.56  |
| 2FYG | A | Nsp10                                                        | Severe acute respiratory syndrome-related coronavirus | 34  | 0.13  |
| 2HC8 | A | The actuator domain from Cu <sup>+</sup> -ATPase             | Archaeoglobus fulgidus                                | 277 | -0.01 |
| 2HL7 | A | The periplasmic domain of cytochromes C maturation protein H | Pseudomonas aeruginosa                                | 55  | 0.72  |
| 2HU9 | A | A Zn <sup>2+</sup> and [2Fe-2S]-containing copper chaperone  | Archaeoglobus fulgidus                                | 102 | 0.78  |



|      |   |                                                                           |                            |     |       |
|------|---|---------------------------------------------------------------------------|----------------------------|-----|-------|
| 2I6V | A | Epsc, a crucial component of the type 2 secretion system                  | Vibrio cholerae            | 254 | 0.55  |
| 2IAY | A | LP2179, a member of the PF08866 family                                    | Lactobacillus plantarum    | 31  | 0.87  |
| 2ICT | A | Antitoxin HigA                                                            | Escherichia coli           | 44  | 0.90  |
| 2J5Y | A | An albumin-binding domain                                                 | Finegoldia magna           | 22  | 0.73  |
| 2NT4 | A | A response regulator homolog                                              | Myxococcus xanthus         | 26  | 0.24  |
| 2O0Q | A | A hypothetical protein                                                    | Caulobacter vibrioides     | 20  | 0.40  |
|      |   |                                                                           |                            | 32  | 0.44  |
| 2OGB | A | The C-terminal domain of neuregulin receptor degrading protein 1          | Mus musculus               | 237 | 0.51  |
| 2OY3 | A | A macrophage receptor                                                     | Mus musculus               | 463 | 0.15  |
| 2P1H | A | The caspase recruitment domains of apoptotic protease activating factor 1 | Homo sapiens               | 35  | 0.58  |
|      |   |                                                                           |                            | 81  | 0.22  |
| 2P3H | A | The CorC_HlyC domain of a putative hemolysin                              | Corynebacterium glutamicum | 31  | 0.40  |
| 2POS | A | Sylvaticin                                                                | Pythium sylvaticum         | 32  | 0.30  |
| 2PSP | A | A pancreatic spasmolytic polypeptide                                      | Sus scrofa                 | 33  | 0.39  |
| 2PVB | A | Parvalbumin                                                               | Esox lucius                | 34  | 0.96  |
| 2PYQ | C | An uncharacterized protein                                                | uncharacterized protein    | 20  | 0.40  |
|      |   |                                                                           |                            | 68  | 0.60  |
| 2QJL | A | A ubiquitin-related modifier                                              | Saccharomyces cerevisiae   | 17  | 0.30  |
| 2RH3 | A | The C-terminal domain of VirC2                                            | Agrobacterium tumefaciens  | 130 | 0.37  |
| 2VB1 | A | Triclinic hen egg-white lysozyme                                          | Gallus gallus              | 16  | 0.60  |
|      |   |                                                                           |                            | 102 | 0.17  |
| 2VSV | A | The PDZ domain of human rhophilin-2                                       | Homo sapiens               | 55  | 0.55  |
| 2VWR | A | The second PDZ domain of the human numb-binding protein 2                 | Homo sapiens               | 379 | 0.60  |
| 2W50 | A | The N-terminal domain of human conserved dopamine neurotrophic factor     | Homo sapiens               | 29  | 0.60  |
|      |   |                                                                           |                            | 60  | 0.71  |
| 2WFB | A | The apo Form of the Orange Protein                                        | Desulfovibrio gigas        | 67  | 0.54  |
|      |   |                                                                           |                            | 88  | 0.64  |
| 2WT8 | A | The N-terminal Brc1 domain of human microcephalin                         | Homo sapiens               | 36  | 0.62  |
|      |   |                                                                           |                            | 67  | 0.59  |
|      |   |                                                                           |                            | 83  | 0.47  |
| 2XEV | B | The TPR domain of YbgF                                                    | Xanthomonas campestris     | 15  | 0.50  |
|      |   |                                                                           |                            | 89  | 0.46  |
| 2ZQE | A | The endonuclease domain of an anti-recombination enzyme                   | Thermus thermophiles       | 31  | 0.63  |
| 3A0S | A | The PAS domain of histidine kinase ThkA                                   | Thermotoga maritima        | 448 | -0.35 |
| 3A0U | A | Response regulator protein TrrA                                           | Thermotoga maritima        | 25  | 0.23  |

|      |   |                                                                                     |                               |     |       |
|------|---|-------------------------------------------------------------------------------------|-------------------------------|-----|-------|
| 3A4R | A | The small ubiquitin-like modifier domain in Nip45                                   | Mus musculus                  | 376 | 0.66  |
| 3B79 | A | The N-terminal peptidase C39 like domain of the toxin secretion ATP-binding protein | Vibrio parahaemolyticus       | 17  | 0.25  |
|      |   |                                                                                     |                               | 49  | 0.73  |
| 3BS7 | A | The sterile alpha motif domain of hyphen/aveugle                                    | Drosophila melanogaster       | 71  | 0.50  |
| 3C9P | A | An uncharacterized protein                                                          | Streptococcus pneumoniae      | 25  | 0.40  |
|      |   |                                                                                     |                               | 40  | 0.47  |
|      |   |                                                                                     |                               | 106 | 0.41  |
| 3CJK | A | Copper transport protein ATOX1                                                      | Homo sapiens                  | 59  | 0.20  |
| 3D2Q | B | The tandem zinc finger 3 and 4 domain of muscleblind-like protein 1                 | Homo sapiens                  | 19  | 0.57  |
| 3E0Z | B | A putative imidazole glycerol phosphate synthase homolog                            | Agathobacter rectalis         | 39  | 0.10  |
| 3E11 | B | A predicted zincin-like metalloprotease                                             | Acidothermus cellulolyticus   | 102 | 0.51  |
| 3EZI | B | Histidine kinase NarX sensor domain                                                 | Escherichia coli              | 94  | 0.75  |
| 3FBL | A | An uncharacterized protein                                                          | Acidianus filamentous virus 1 | 66  | 0.60  |
| 3FZ4 | A | A possible arsenate reductase                                                       | Streptococcus mutans          | 50  | 0.26  |
|      |   |                                                                                     |                               | 68  | 1.07  |
| 3ID4 | A | RseP PDZ2 domain                                                                    | Escherichia coli              | 239 | 0.58  |
| 3IPJ | A | A domain of the PTS system                                                          | Peptoclostridium difficile    | 83  | 0.34  |
| 3L2A | A | VP35 interferon inhibitory domain                                                   | Reston ebolavirus             | 259 | 0.31  |
| 3LJW | B | The second bromodomain of human polybromo                                           | Homo sapiens                  | 240 | 1.67  |
| 3LLB | A | An uncharacterized protein                                                          | Pseudomonas aeruginosa        | 27  | -0.13 |
|      |   |                                                                                     |                               | 47  | -0.06 |
| 3M3G | A | An elicitor of plant defense responses                                              | Trichoderma virens            | 115 | 0.70  |
| 3NIR | A | Crambin                                                                             | Crambe hispanica              | 20  | 0.17  |
|      |   |                                                                                     |                               | 31  | 0.27  |
| 3NUF | A | A PRD-containing transcription regulator                                            | Lactobacillus paracasei       | 67  | 0.59  |
| 3O79 | B | A Prion protein                                                                     | Oryctolagus cuniculus         | 195 | 0.23  |
| 3ODV | A | Kalioxin                                                                            | Androctonus mauritanicus      | 22  | 1.28  |
| 3PO0 | A | A Ubiquitin-like small archaeal modifier proteins                                   | Haloferax volcanii            | 14  | 0.27  |
| 3QMX | A | Glutaredoxin A                                                                      | Synechocystis sp. PCC 6803    | 29  | -0.32 |
| 3S0A | A | An odorant-binding protein                                                          | Apis mellifera                | 22  | 0.47  |
|      |   |                                                                                     |                               | 34  | 0.90  |
| 3SNS | A | The C-terminal domain of lipoprotein BamC                                           | Escherichia coli              | 263 | 1.12  |
|      |   |                                                                                     |                               | 292 | 0.82  |
| 3SVI | A | The Pto-binding domain of                                                           | Pseudomonas syringae          | 157 | 0.48  |

|      |   |                                                                                         |                               |     |       |
|------|---|-----------------------------------------------------------------------------------------|-------------------------------|-----|-------|
|      |   | HopPmaL                                                                                 | group genomosp. 3             | 173 | 0.44  |
| 3SZS | B | Hellethionin D                                                                          | Helleborus purpurascens       | 20  | 0.33  |
| 3T7Z | A | Nop N-terminal domain                                                                   | Methanocaldococcus jannaschii | 60  | -0.13 |
|      |   |                                                                                         |                               | 91  | 0.56  |
| 3UI6 | A | Parvulin 14                                                                             | Homo sapiens                  | 61  | 0.29  |
| 3V1A | A | A Metal interface design                                                                | synthetic construct           | 22  | 0.61  |
| 3W1O | A | A hypothetical protein                                                                  | Neisseria meningitidis        | 51  | 0.86  |
| 3WCQ | A | Ferredoxin                                                                              | Cyanidioschyzon merolae       | 33  | 0.31  |
|      |   |                                                                                         |                               | 73  | 0.55  |
| 3ZR8 | X | Rxlr effector AVR3a11                                                                   | Phytophthora capsici          | 100 | 0.65  |
| 4CVD | A | A cell wall binding module                                                              | Streptococcus phage Cp-1      | 263 | 1.08  |
|      |   |                                                                                         |                               | 279 | 0.33  |
| 4D40 | A | Type IV pilin                                                                           | Shewanella oneidensis         | 28  | 0.17  |
| 4F55 | A | The catalytic Domain of SleB rotein                                                     | Bacillus cereus               | 202 | 0.56  |
|      |   |                                                                                         |                               | 222 | 0.23  |
| 4FQN | A | CCM2 C-terminal harmonin homology domain                                                | Homo sapiens                  | 328 | 0.50  |
| 4G9S | A | A goose-type lysozyme                                                                   | Escherichia coli              | 60  | 1.04  |
| 4GOQ | A | A hypothetical protein                                                                  | Caulobacter vibrioides        | 20  | 0.41  |
| 4HRO | A | Small archaeal modifier protein 1                                                       | Haloferax volcanii            | 14  | 0.22  |
| 4HS5 | A | Protein CyaY                                                                            | Psychromonas ingrahamii       | 25  | 0.60  |
| 4JIU | A | An uncharacterized protein                                                              | Pyrococcus abyssi             | 14  | 0.50  |
| 4N6X | A | Na(+)/H(+) exchange regulatory cofactor NHE-RF1/Chemokine receptor CXCR2 fusion protein | Homo sapiens                  | 52  | 0.89  |
| 4PXV | A | The LysM domain of chitinase A                                                          | Pteris ryukyuensis            | 32  | 0.62  |
| 4XPX | A | Hemerythrin                                                                             | Methylococcus capsulatus      | 69  | 0.37  |
|      |   |                                                                                         |                               | 97  | 0.54  |

## Experimental Thermal Denaturation of EH, HP35, PSBD and Their D-Ala Variants

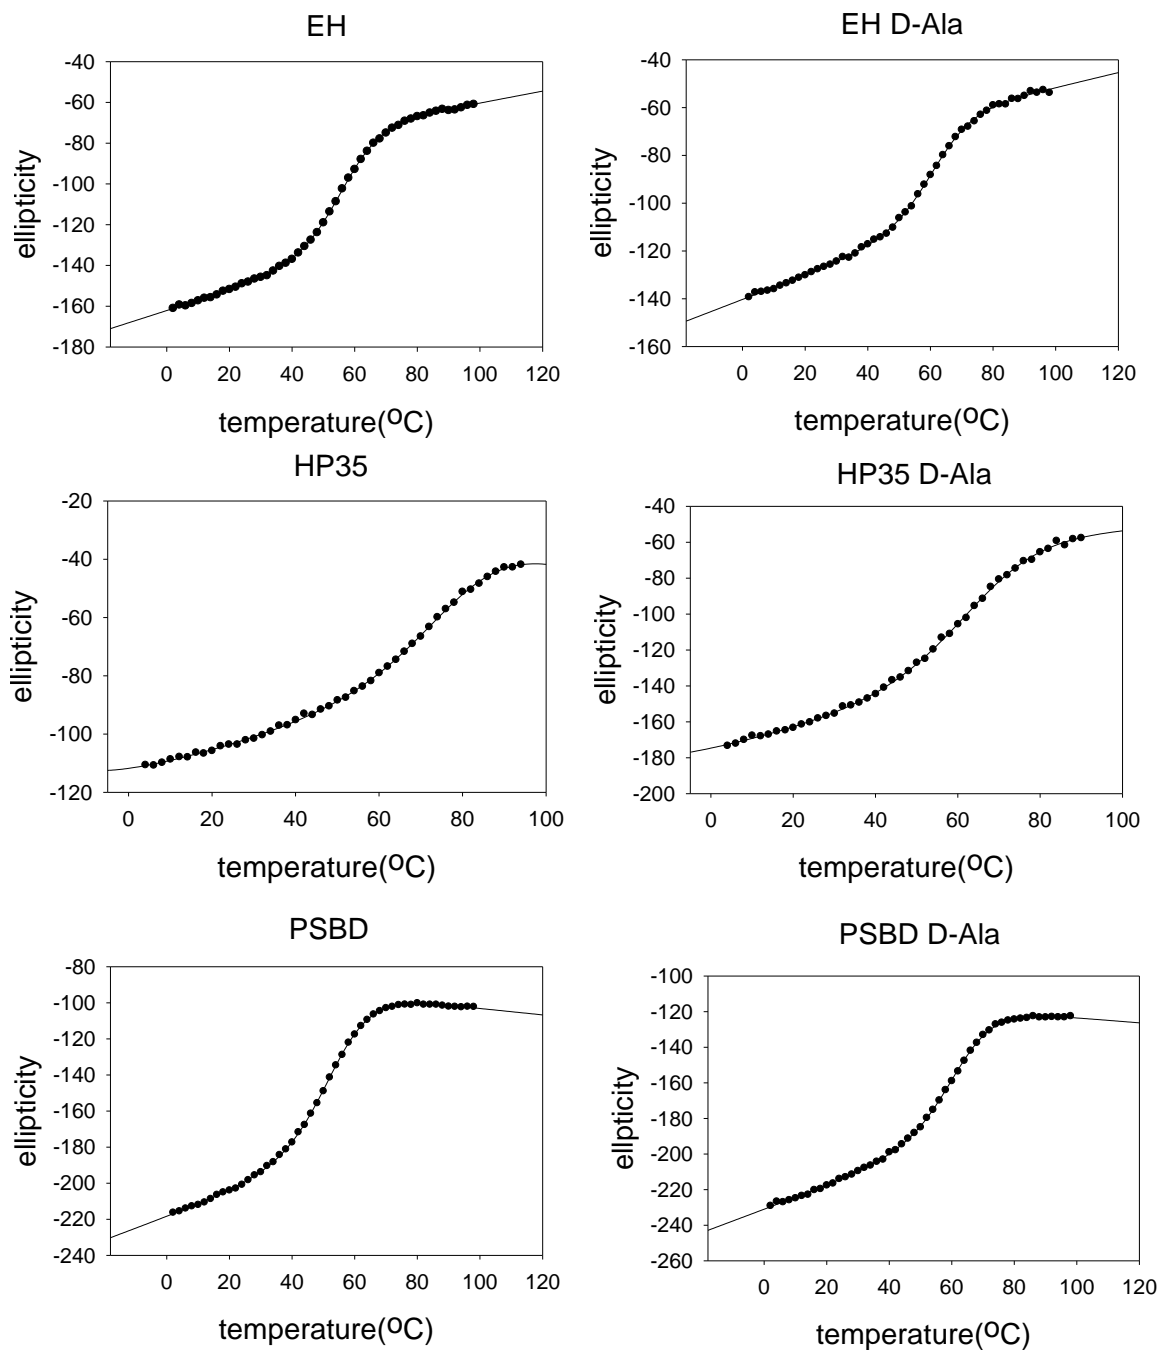

**Figure S1.** Thermal denaturation of EH, HP35, PSBD and their D-Ala variants. The solid line are the fitted curves.

# Urea/Guanidine Hydrochloride Denaturation of EH, GA, HP35, PSBD and Their D-Ala

## Variants

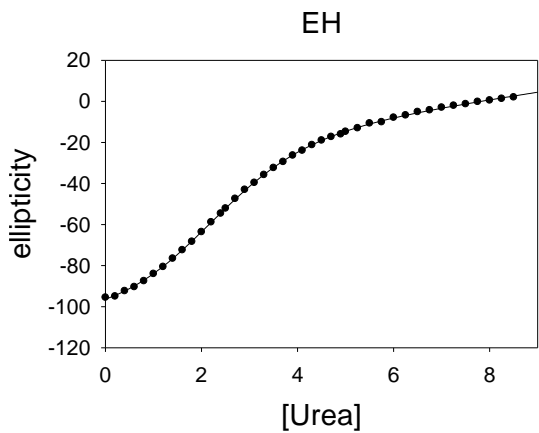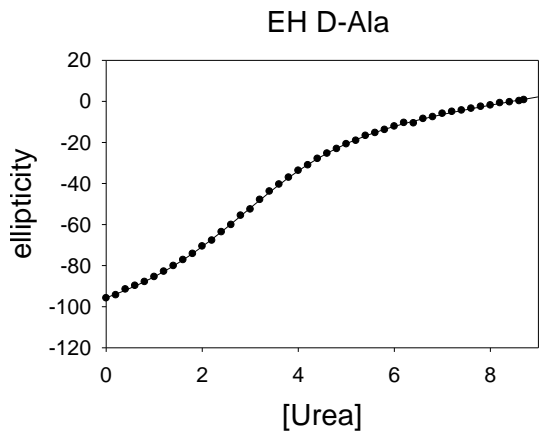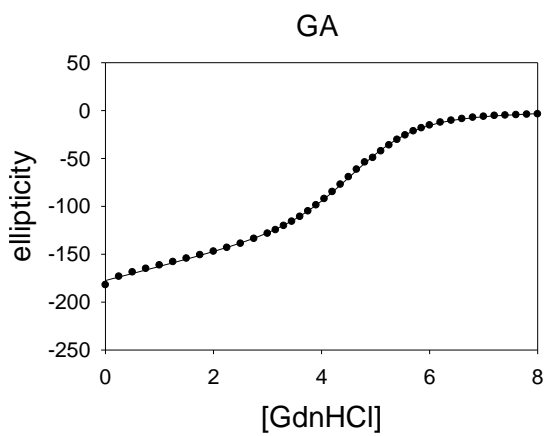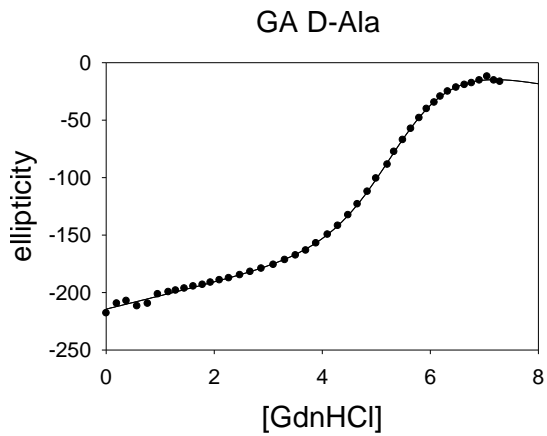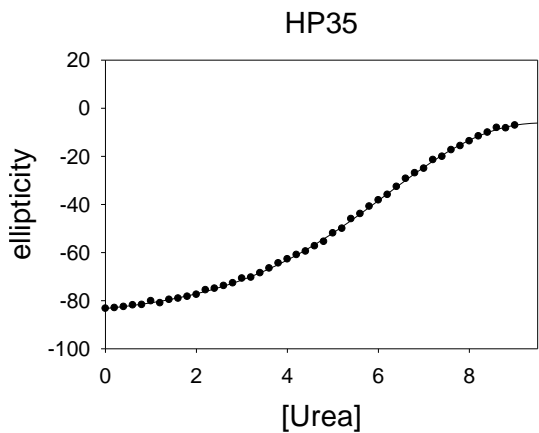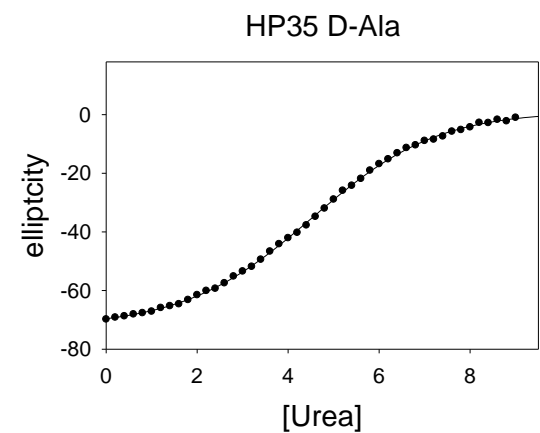

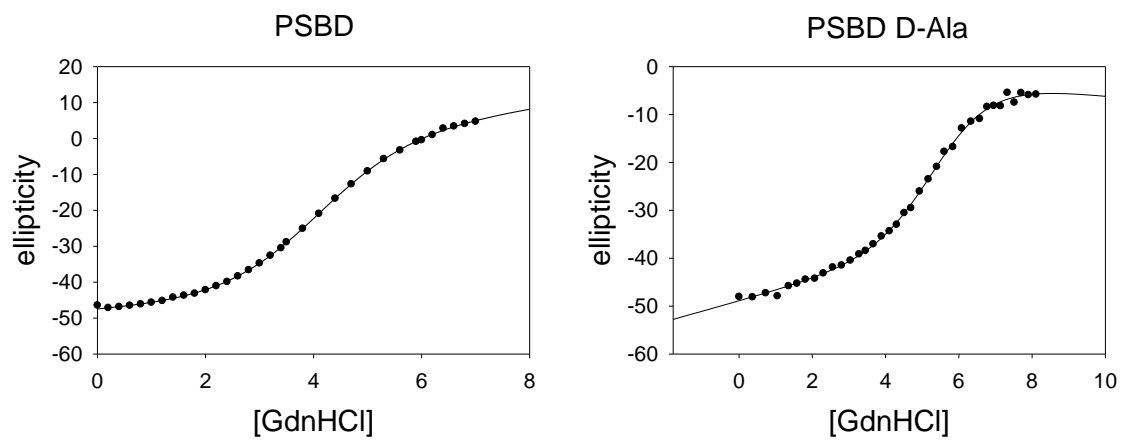

**Figure S2.** Urea/Guanidine hydrochloride denaturation of EH, GA, HP35, PSBD and their D-Ala variants. The solid lines are the fitted curves.

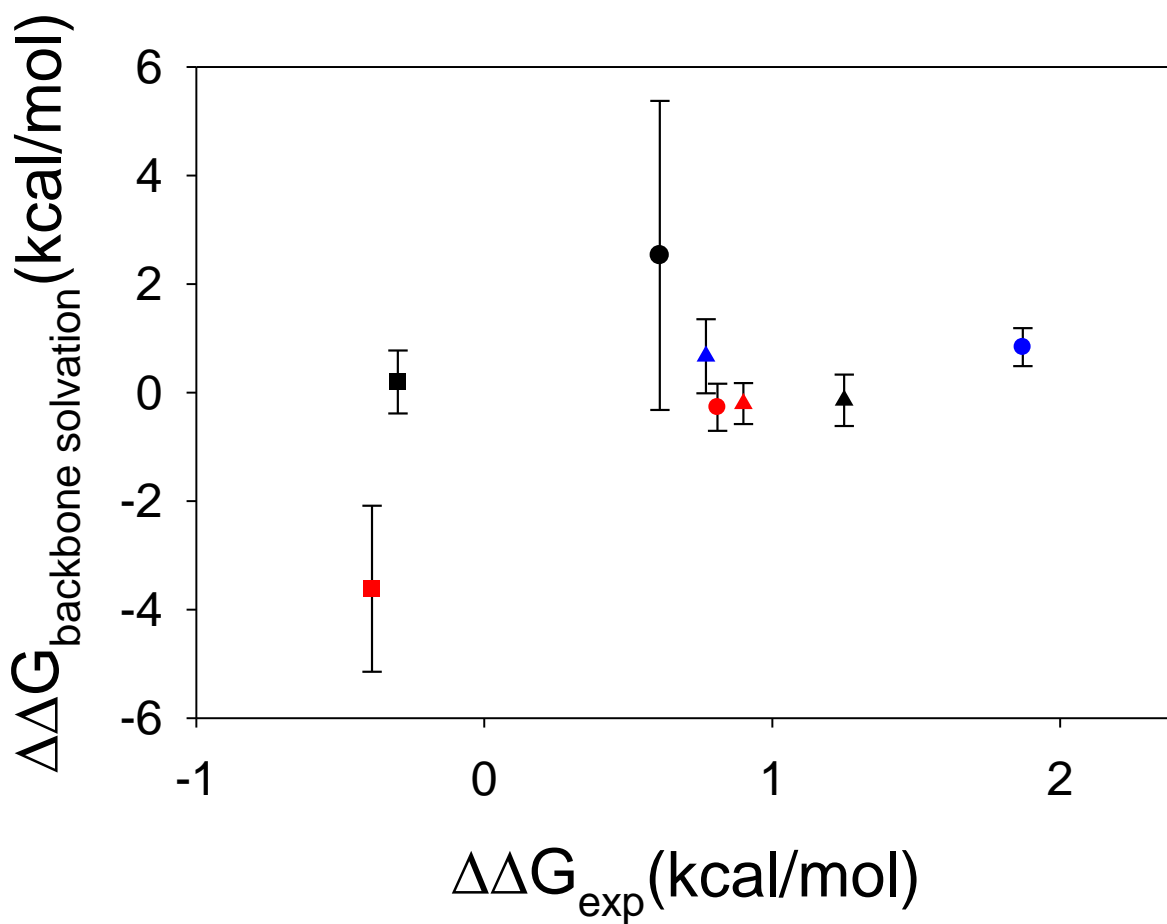

**Figure S3.** Correlation between  $\Delta\Delta G_{\text{backbone solvation}}$  and  $\Delta\Delta G_{\text{exp}}$ .  $r=0.52$ ,  $p=0.19$ . If only proteins with good convergence are included (GA, NTL9, PSBD, Trp-cage, UBA and ubiquitin),  $r=0.28$ ,  $p\text{-value}=0.58$ ,  $\text{slope}=0.20$ . EH ●; GA ●; HP35 ■; NTL9 ●; PSBD ▲; Trp-cage ▲; UBA ▲; Ubiquitin ■;

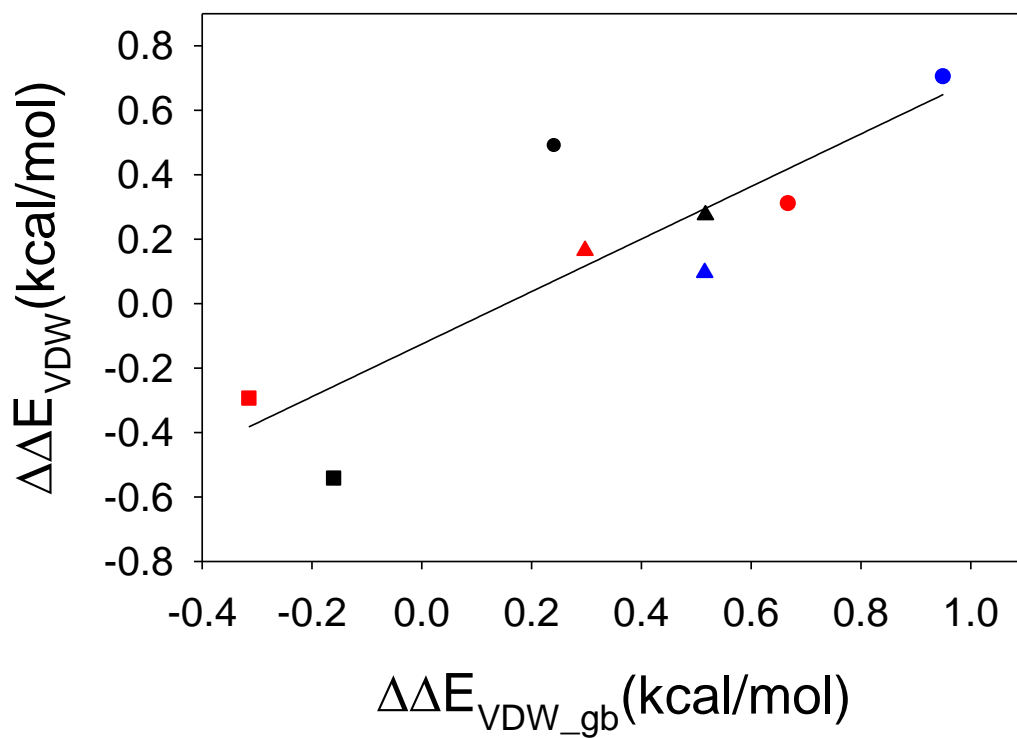

**Figure S4.** Correlation between  $\Delta\Delta E_{\text{vdw}}$  and  $\Delta\Delta E_{\text{vdw\_gb}}$ .  $r=0.84$ ,  $p=0.0079$ . EH ●; GA ●; HP35 ■; NTL9 ●; PSBD ▲; Trp-cage ▲; UBA ▲; Ubiquitin ■;



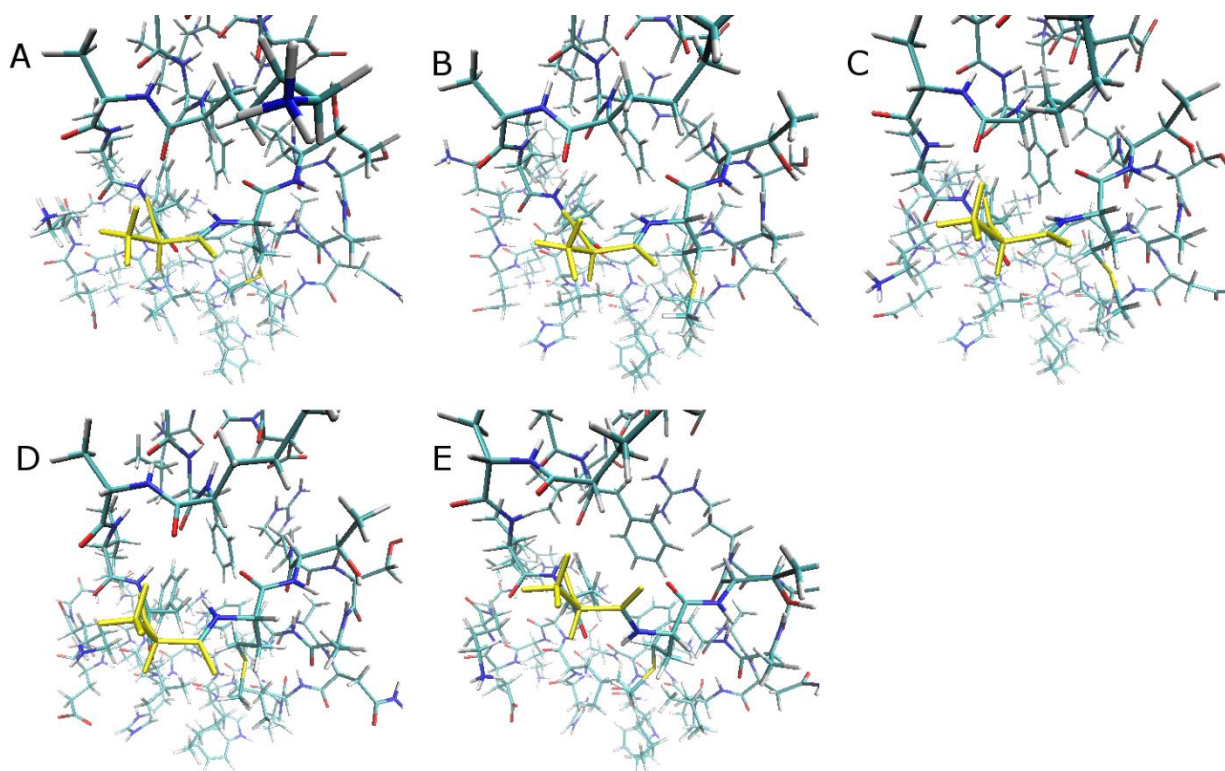

**Figure S5.** Structure of the HP35 G11D-Ala mutant taken from an MD simulation. 5 snapshots at 40 ns (A), 80 ns (B), 120 ns (C), 160 ns (D) and 200 ns (E) are shown with hydrogen included. The D-Ala residues are colored yellow.

1. Carpino, L. A.; Han, G. Y., *J. Am. Chem. Soc.* **1970**, *92*, 5748-&.
2. Humphrey, W.; Dalke, A.; Schulten, K., *J. Mol. Graph.* **1996**, *14*, 33-38, 27-38.
3. D.A. Case, J. T. B., R.M. Betz, D.S. Cerutti, T.E. Cheatham, III, T.A. Darden, R.E. Duke, T.J. Giese, H. Gohlke, A.W. Goetz, N. Homeyer, S. Izadi, P. Janowski, J. Kaus, A. Kovalenko, T.S. Lee, S. LeGrand, P. Li, T. Luchko, R. Luo, B. Madej, K.M. Merz, G. Monard, P. Needham, H. Nguyen, H.T. Nguyen, I. Omelyan, A. Onufriev, D.R. Roe, A. Roitberg, R. Salomon-Ferrer, C.L. Simmerling, W. Smith, J. Swails, R.C. Walker, J. Wang, R.M. Wolf, X. Wu, D.M. York and P.A. Kollman *AMBER 2015*. University of California, San Francisco, 2015.
4. Clarke, N. D.; Kissinger, C. R.; Desjarlais, J.; Gilliland, G. L.; Pabo, C. O., *Protein Sci.* **1994**, *3*, 1779-1787.
5. Johansson, M. U.; de Chateau, M.; Wikstrom, M.; Forsen, S.; Drakenberg, T.; Bjorck, L., *J. Mol. Biol.* **1997**, *266*, 859-865.
6. Chiu, T. K.; Kubelka, J.; Herbst-Irmer, R.; Eaton, W. A.; Hofrichter, J.; Davies, D. R., *Proc. Natl. Acad. Sci. U. S. A.* **2005**, *102*, 7517-7522.
7. Cho, J. H.; Meng, W.; Sato, S.; Kim, E. Y.; Schindelin, H.; Raleigh, D. P., *Proc. Natl. Acad. Sci. U. S. A.* **2014**, *111*, 12079-12084.
8. Kalia, Y. N.; Brocklehurst, S. M.; Hipps, D. S.; Appella, E.; Sakaguchi, K.; Perham, R. N., *J. Mol. Biol.* **1993**, *230*, 323-341.
9. Neidigh, J. W.; Fesinmeyer, R. M.; Andersen, N. H., *Nat. Struct. Biol.* **2002**, *9*, 425-430.
10. Withers-Ward, E. S.; Mueller, T. D.; Chen, I. S. Y.; Feigon, J., *Biochemistry* **2000**, *39*, 14103-14112.
11. Vijaykumar, S.; Bugg, C. E.; Cook, W. J., *J. Mol. Biol.* **1987**, *194*, 531-544.
12. Guex, N.; Peitsch, M. C., *Electrophoresis* **1997**, *18*, 2714-2723.
13. Maier, J. A.; Martinez, C.; Kasavajhala, K.; Wickstrom, L.; Hauser, K. E.; Simmerling, C., *J. Chem. Theory Comput.* **2015**, *11*, 3696-3713.
14. Jorgensen, W. L.; Chandrasekhar, J.; Madura, J. D.; Impey, R. W.; Klein, M. L., *J. Chem. Phys.* **1983**, *79*, 926-935.
15. Houry, G. A.; Smadbeck, J.; Tamamis, P.; Vandris, A. C.; Kieslich, C. A.; Floudas, C. A., *ACS Synth. Biol.* **2014**, *3*, 855-869.
16. Berendsen, H. J. C.; Postma, J. P. M.; Vangunsteren, W. F.; Dinola, A.; Haak, J. R., *J. Chem. Phys.* **1984**, *81*, 3684-3690.
17. Darden, T.; York, D.; Pedersen, L., *J. Chem. Phys.* **1993**, *98*, 10089-10092.
18. Ryckaert, J. P.; Ciccotti, G.; Berendsen, H. J. C., *J. Comput. Phys.* **1977**, *23*, 327-341.
19. Gordon, J. C.; Myers, J. B.; Folta, T.; Shoja, V.; Heath, L. S.; Onufriev, A., *Nucleic Acids Res.* **2005**, *33*, W368-371.
20. Bang, D.; Gribenko, A. V.; Tereshko, V.; Kossiakoff, A. A.; Kent, S. B.; Makhatadze, G. I., *Nat. Chem. Biol.* **2006**, *2*, 139-143.
21. Kirkwood, J. G., *J. Chem. Phys.* **1935**, *3*, 300-313.
22. Roe, D. R.; Cheatham, T. E., 3rd, *J. Chem. Theory Comput.* **2013**, *9*, 3084-3095.
23. Li, L.; Li, C.; Sarkar, S.; Zhang, J.; Witham, S.; Zhang, Z.; Wang, L.; Smith, N.; Petukh, M.; Alexov, E., *BMC Biophys.* **2012**, *5*, 9.
24. Yamagishi, J.; Okimoto, N.; Morimoto, G.; Taiji, M., *J. Comput. Chem.* **2014**, *35*, 2132-2139.
25. Nguyen, H.; Maier, J.; Huang, H.; Perrone, V.; Simmerling, C., *J. Am. Chem. Soc.* **2014**, *136*, 13959-13962.
26. Nguyen, H.; Roe, D. R.; Simmerling, C., *J. Chem. Theory Comput.* **2013**, *9*, 2020-2034.

27. Altschul, S. F.; Gish, W.; Miller, W.; Myers, E. W.; Lipman, D. J., *J. Mol. Biol.* **1990**, *215*, 403-410.
28. Gunasekaran, K.; Nagarajaram, H. A.; Ramakrishnan, C.; Balaram, P., *J. Mol. Biol.* **1998**, *275*, 917-932.
29. Madej, T.; Lanczycki, C. J.; Zhang, D.; Thiessen, P. A.; Geer, R. C.; Marchler-Bauer, A.; Bryant, S. H., *Nucleic Acids Res.* **2014**, *42*, D297-303.
